# Supplementary material for: Factors associated with emergency-onset diagnosis, time to treatment and type of treatment in colorectal cancer patients in Norway
Source: PubMed Central journal article supplement (PMC8244161; doi:10.1186/s12885-021-08415-1), 2021-06-30
Supplement: 12885_2021_8415_MOESM7_ESM.pdf [file 12885_2021_8415_MOESM7_ESM.pdf]

# Proportion first and ever treated per age group

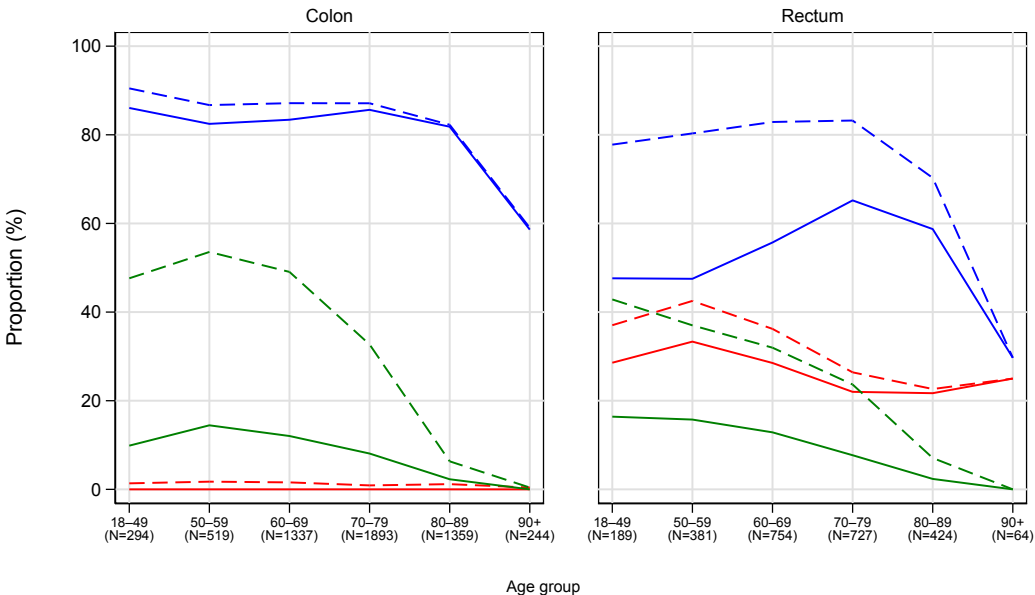

First      — Surgery      — Radiotherapy      — Systemic Anticancer Treatment  
 Ever      - - Surgery      - - Radiotherapy      - - Systemic Anticancer Treatment
